# Supplementary material for: The impact of successful chronic total occlusion percutaneous coronary intervention on clinical outcomes: a tertiary single-center analysis
Source: PubMed Central journal article supplement (PMC11470476; doi:10.3389/fcvm.2024.1447829), 2024-09-27
Supplement: Table1.pdf [file Table1.pdf]

**Supplementary Table 1.** Echocardiographic findings of patients who underwent CTO-PCI

| Variable                                 | Failed CTO-PCI<br>(n=48) |      | Successful CTO-PCI<br>(n=252) |      | p-value |
|------------------------------------------|--------------------------|------|-------------------------------|------|---------|
|                                          | N                        | %    | N                             | %    |         |
| LV function                              |                          |      |                               |      | 0.55    |
| Good function                            | 27                       | 56.3 | 139                           | 57.0 |         |
| Slightly reduced                         | 10                       | 20.8 | 40                            | 16.4 |         |
| Low-moderate reduction                   | 2                        | 4.2  | 8                             | 3.2  |         |
| Moderate reduction                       | 1                        | 2.1  | 25                            | 10.3 |         |
| Moderate to severe reduction             | 1                        | 2.1  | 5                             | 2.1  |         |
| Severe reduction                         | 7                        | 14.6 | 27                            | 11.1 |         |
| LV configuration                         |                          |      |                               |      | 0.26    |
| Normal                                   | 38                       | 79.2 | 208                           | 85.6 |         |
| Dilated                                  | 10                       | 20.8 | 35                            | 14.4 |         |
| Diastolic impairment                     |                          |      |                               |      | 0.060†  |
| None                                     | 18                       | 37.5 | 125                           | 50.8 |         |
| Grade 1                                  | 22                       | 45.8 | 76                            | 30.9 |         |
| Grade 2                                  | 3                        | 6.3  | 32                            | 13.0 |         |
| Grade 3                                  | 5                        | 10.4 | 13                            | 5.3  |         |
| Left ventricular hypertrophy             |                          |      |                               |      | 0.77    |
| None                                     | 21                       | 43.8 | 116                           | 47.2 |         |
| Mild                                     | 20                       | 41.7 | 96                            | 39.0 |         |
| Moderate                                 | 7                        | 14.6 | 30                            | 12.2 |         |
| Severe                                   | 0                        | 0.0  | 4                             | 1.6  |         |
| Dilated right ventricle                  | 4                        | 8.7  | 11                            | 4.5  | 0.24    |
| Right ventricular function               |                          |      |                               |      | 0.39    |
| Normal                                   | 41                       | 91.1 | 214                           | 88.1 |         |
| Mildly reduced                           | 0                        | 0    | 13                            | 5.4  |         |
| Moderately reduced                       | 2                        | 4.4  | 10                            | 4.1  |         |
| Severely reduced                         | 2                        | 4.4  | 6                             | 2.5  |         |
| Regional wall motion abnormality         | 28                       | 58.3 | 129                           | 52.4 | 0.45    |
| Diffuse regional wall motion abnormality | 4                        | 8.3  | 27                            | 11.0 | 0.59    |

|                                              |    |      |     |      |        |
|----------------------------------------------|----|------|-----|------|--------|
| Location of regional wall motion abnormality |    |      |     |      |        |
| Basal anteriorseptal                         | 4  | 8.3  | 14  | 5.7  | 0.49   |
| Basal inferiorseptal                         | 9  | 18.8 | 33  | 13.4 | 0.33   |
| Basal inferior                               | 21 | 43.8 | 85  | 34.6 | 0.23   |
| Basal anterolateral                          | 2  | 4.2  | 19  | 7.7  | 0.38   |
| Mid anterior                                 | 3  | 6.3  | 10  | 4.1  | 0.50   |
| Mid anteroseptal                             | 2  | 4.2  | 18  | 7.3  | 0.43   |
| Mid inferoseptal                             | 6  | 12.5 | 21  | 8.5  | 0.38   |
| Mid inferior                                 | 6  | 12.5 | 28  | 11.4 | 0.83   |
| Mid anterolateral                            | 2  | 4.2  | 13  | 5.3  | 0.75   |
| Apical anterior                              | 5  | 10.4 | 36  | 14.6 | 0.44   |
| Apical septal                                | 11 | 22.9 | 46  | 18.7 | 0.50   |
| Apical inferior                              | 12 | 25.0 | 40  | 16.3 | 0.15   |
| Apical lateral                               | 6  | 12.5 | 26  | 10.6 | 0.69   |
| Posterolateral                               | 18 | 37.5 | 59  | 24.0 | 0.051† |
| Aortic valve thickening                      | 9  | 18.8 | 37  | 15.2 | 0.53   |
| Aortic valve calcification                   | 1  | 2.1  | 10  | 4.1  | 0.51   |
| Aortic valve sclerosis                       | 19 | 39.6 | 77  | 31.3 | 0.26   |
| Aortic valve insufficiency                   | 10 | 20.8 | 56  | 22.8 | 0.77   |
| Mitral insufficiency                         | 35 | 72.9 | 148 | 60.2 | 0.095† |
| Tricuspid insufficiency                      | 19 | 39.6 | 72  | 29.3 | 0.16   |
| Systolic pulmonary pressure                  | 11 | 29.0 | 72  | 43.9 | 0.21   |
| Not tested                                   | 21 | 55.3 | 67  | 40.9 |        |
| No increased                                 | 6  | 15.8 | 25  | 15.2 |        |
| Increased                                    |    |      |     |      |        |
| Pericardial effusion                         | 1  | 2.1  | 7   | 2.9  | 0.77   |
| Ascending aorta diameter                     |    |      |     |      | 0.72   |
| 0                                            | 39 | 81.3 | 189 | 76.8 |        |
| 1                                            | 7  | 14.6 | 48  | 19.5 |        |
| 2                                            | 2  | 4.2  | 9   | 3.7  |        |

**Abbreviations:** LV=left ventricular

**Supplementary Table 2.** Blood parameters and chronic kidney disease staging of patients who underwent CTO-PCI

| Variable                 | Failed CTO-PCI (n=48) |       | Successful CTO-PCI (n=252) |       | p-value |
|--------------------------|-----------------------|-------|----------------------------|-------|---------|
| <b>Pre-procedure</b>     |                       |       |                            |       |         |
| Hb                       | 13.3                  | ±1.8  | 13.9                       | ±1.6  | 0.031*  |
| Haematocrit              | 39.3                  | ±5.3  | 40.8                       | ±4.4  | 0.053†  |
| Platelet                 | 259                   | ±123  | 240                        | ±83   | 0.19    |
| Leukocytes               | 7.9                   | ±3.2  | 8.2                        | ±3.3  | 0.56    |
| CRP                      | 0.6                   | ±1.6  | 1.1                        | ±2.7  | 0.26    |
| Sodium                   | 140                   | ±5    | 141                        | ±8    | 0.36    |
| Potassium                | 4.5                   | ±0.5  | 4.4                        | ±0.5  | 0.16    |
| Creatinine               | 1.1                   | ±0.4  | 1.1                        | ±0.7  | 0.67    |
| eGFR                     | 74                    | ±33   | 70                         | ±20   | 0.32    |
| CKD stage                |                       |       |                            |       | 0.92    |
| KDIGO1                   | 5                     | 11.6% | 28                         | 13.0% |         |
| KDIGO2                   | 29                    | 67.4% | 146                        | 67.9% |         |
| KDIGO3a                  | 5                     | 6.0%  | 27                         | 12.6% |         |
| KDIGO3b                  | 3                     | 6.0%  | 10                         | 4.7%  |         |
| KDIGO4                   | 1                     | 2.3%  | 2                          | 0.9%  |         |
| KDIGO5                   | 0                     | 0%    | 2                          | 0.9%  |         |
| BUN                      | 19.2                  | ±10.4 | 19.1                       | ±10.3 | 0.98    |
| Glucose                  | 130                   | ±46   | 124                        | ±50   | 0.50    |
| CK                       | 133                   | ±132  | 175                        | ±343  | 0.43    |
| hsTroponin               | 68                    | ±143  | 413                        | ±2195 | 0.32    |
| ProBNP                   | 1454                  | ±2611 | 953                        | ±2010 | 0.39    |
| NTproBNP                 | 1262                  | ±2273 | 1654                       | ±3699 | 0.63    |
| Cholesterol              | 142                   | ±29   | 153                        | ±44   | 0.15    |
| HDL                      | 50                    | ±13   | 47                         | ±14   | 0.26    |
| LDL                      | 80                    | ±28   | 93                         | ±37   | 0.040*  |
| Triglycerides            | 130                   | ±60   | 156                        | ±98   | 0.12    |
| HbA1c                    | 6.1                   | ±0.7  | 6.3                        | ±0.9  | 0.29    |
| <b>Post-procedure</b>    |                       |       |                            |       |         |
| Hb                       | 12                    | ±3    | 13                         | ±2    | 0.18    |
| Creatinine               | 1.1                   | ±0.4  | 1.2                        | ±0.9  | 0.49    |
| eGFR                     | 75                    | ±39   | 70                         | ±27   | 0.38    |
| Post-procedure CKD stage |                       |       |                            |       | 0.94    |
| KDIGO1                   | 3                     | 11.1% | 21                         | 14.7% |         |
| KDIGO2                   | 16                    | 59.3% | 86                         | 60.1% |         |
| KDIGO3a                  | 6                     | 22.2% | 23                         | 16.1% |         |
| KDIGO3b                  | 1                     | 3.7%  | 7                          | 4.9%  |         |
| KDIGO4                   | 1                     | 3.7%  | 4                          | 2.8%  |         |
| KDIGO5                   | 0                     | 0%    | 2                          | 1.4%  |         |
| CK                       | 191                   | ±446  | 167                        | ±320  | 0.69    |
| hs Troponin              | 308                   | ±741  | 380                        | ±1444 | 0.77    |

**Abbreviations:** **Hb**=hemoglobin, **CKD**=chronic kidney disease, **BUN**=blood urea nitrogen, **CK**=creatinine kinase, **eGFR**=estimated glomerular filtration rate, **HbA1c**=hemoglobin A1C, **BNP**=brain natriuretic peptide
